# Supplementary material
Source: PubMed Central journal article supplement (PMC7263950)

## A) BPS vs. HC contrast

## B) Blinded exam contrast

within BPS participants

|                                                      | <u>HC (n=41)</u> | <u>BPS (n=20)</u> | <u>P-value</u> | <u>Nonpatients</u><br><u>(n=7)</u> | <u>Patients</u><br><u>(n=13)</u> | <u>P-Value</u> |
|------------------------------------------------------|------------------|-------------------|----------------|------------------------------------|----------------------------------|----------------|
| <b><u>Width of the vaginal opening</u></b>           |                  |                   |                |                                    |                                  |                |
| One Finger                                           | 33 (80.5%)       | 11 (55.0%)        | 0.950          | 3 (42.9%)                          | 8 (61.5%)                        | 0.636          |
| Two Fingers                                          | 8 (19.5%)        | 8 (40.0%)         |                | 3 (42.9%)                          | 5 (38.5%)                        |                |
| Two Fingers, Can Wiggle                              | 0 (0.0%)         | 1 (5.0%)          |                | 1 (14.3%)                          |                                  |                |
| <b><u>Genital hiatus (cm)</u></b>                    | 1.04 (0.07)      | 1.01 (0.08)       | 0.795          | 1.02 (0.21)                        | 1.03 (0.08)                      | 0.872          |
| <b><u>Perineal body (cm)</u></b>                     | 2.01 (0.06)      | 2.00 (0.08)       | 0.923          | 2.07 (0.14)                        | 1.92 (0.10)                      | 0.371          |
| <b><u>Ability to relax PFM after contraction</u></b> |                  |                   |                |                                    |                                  |                |
| 100% Relaxation                                      | 34 (82.9%)       | 18 (90.0%)        | 0.464          | 6 (85.7%)                          | 12 (92.3%)                       | 0.634          |
| Some Relaxation                                      | 7 (17.1%)        | 2 (10.0%)         |                | 1 (14.3%)                          | 1 (7.7%)                         |                |
| <b><u>General PFM strength</u></b>                   |                  |                   |                |                                    |                                  |                |
| 0 (unable to contract)                               | 9 (22.0%)        | 1 (5.0%)          | 0.465          | 1 (14.3%)                          | 0 (0.0%)                         | 0.372          |
| 1                                                    | 11 (26.8%)       | 3 (15.0%)         |                | 1 (14.3%)                          | 2 (15.4%)                        |                |
| 2                                                    | 6 (14.6%)        | 4 (20.0%)         |                | 0 (0.0%)                           | 4 (30.8%)                        |                |
| 3                                                    | 8 (19.5%)        | 7 (35.0%)         |                | 3 (42.9%)                          | 4 (30.8%)                        |                |
| 4                                                    | 6 (14.6%)        | 5 (25.0%)         |                | 2 (28.64%)                         | 3 (23.0%)                        |                |
| 5 (strong contraction)                               | 1 (2.4%)         | 0 (0.0%)          |                | 0 (0.0%)                           | 0 (0.0%)                         |                |

|                                        |          |            |             |                  |            |             |       |
|----------------------------------------|----------|------------|-------------|------------------|------------|-------------|-------|
| <b><u>Uterine mobility</u></b>         | Yes      | 40 (97.6%) | 17 (85.0%)  | 0.63             | 6 (85.7%)  | 11 (84.6%)  | 0.950 |
| <b><u>Uterine size</u></b>             | Normal   | 40 (97.6%) | 20 (100.0%) | .481             | 7 (100.0%) | 13 (100.0%) | 0.999 |
|                                        | Enlarged | 1 (2.4%)   | 0 (0.0%)    |                  |            |             |       |
| <b><u>Vaginal tenderness *</u></b>     |          | 0.1 (0.1)  | 0.6 (0.3)   | 0.052            | 1.1 (0.6)  | 0.3 (0.3)   | 0.199 |
| <b><u>Abdominal tenderness</u></b>     |          | 0.0 (0.0)  | 1.5 (0.4)   | <b>&lt;0.001</b> | 2.0 (0.6)  | 1.8 (0.4)   | 0.718 |
| <b><u>Pubic tenderness</u></b>         |          | 0.9 (0.3)  | 3.1 (0.6)   | <b>&lt;0.001</b> | 4.0 (1.0)  | 2.3 (0.7)   | 0.171 |
| <b><u>SIJ tenderness</u></b>           |          | 0.0 (0.0)  | 1.0 (0.5)   | <b>0.005</b>     | 1.9 (1.2)  | 0.5 (0.4)   | 0.481 |
| <b><u>Iliococcygeus tenderness</u></b> |          | 1.0 (0.3)  | 2.8 (0.6)   | <b>0.004</b>     | 4.1 (1.3)  | 2.0 (0.6)   | 0.102 |
| <b><u>Bladder tenderness</u></b>       |          | 1.1 (0.3)  | 3.3 (0.9)   | <b>0.005</b>     | 3.4 (1.2)  | 2.9 (0.9)   | 0.738 |
| <b><u>Urethral tenderness</u></b>      |          | 0.7 (0.3)  | 2.7 (0.7)   | <b>0.003</b>     | 2.6 (1.2)  | 1.9 (0.7)   | 0.621 |
| <b><u>Uterine tenderness</u></b>       |          | 1.2 (0.4)  | 4.7 (0.8)   | <b>&lt;0.001</b> | 5.1 (1.4)  | 3.9 (0.8)   | 0.416 |
| <b><u>Tampon test</u></b>              |          | 0.7 (0.2)  | 3.1 (0.5)   | <b>&lt;0.001</b> | 3.4 (1.3)  | 2.8 (0.6)   | 0.639 |

**Supplemental Table 1: Comparative pelvic exam characteristics of women with BPS vs. healthy controls, including blinding comparison**

The mean (SEM - standard error of the mean) or sample size (percentage) for each item among healthy controls (HC) or women with BPS. In A) P-values are shown for differences between HC and BPS. In B) Group average or sample sizes of BPS patients that are patients of the examiners (n=13) vs. non-patients (n=7) are also shown. P-values are shown for differences between patients and non-patients. HC healthy controls, BPS bladder pain syndrome, PFM – pelvic floor muscle, SIJ – sacroiliac joint, \* - all tenderness is on 0-10 numeric rating scale

**Supplemental Figure 1. Enrollment table for dysmenorrhea clinical characteristics study.**

Journal Pre-proof

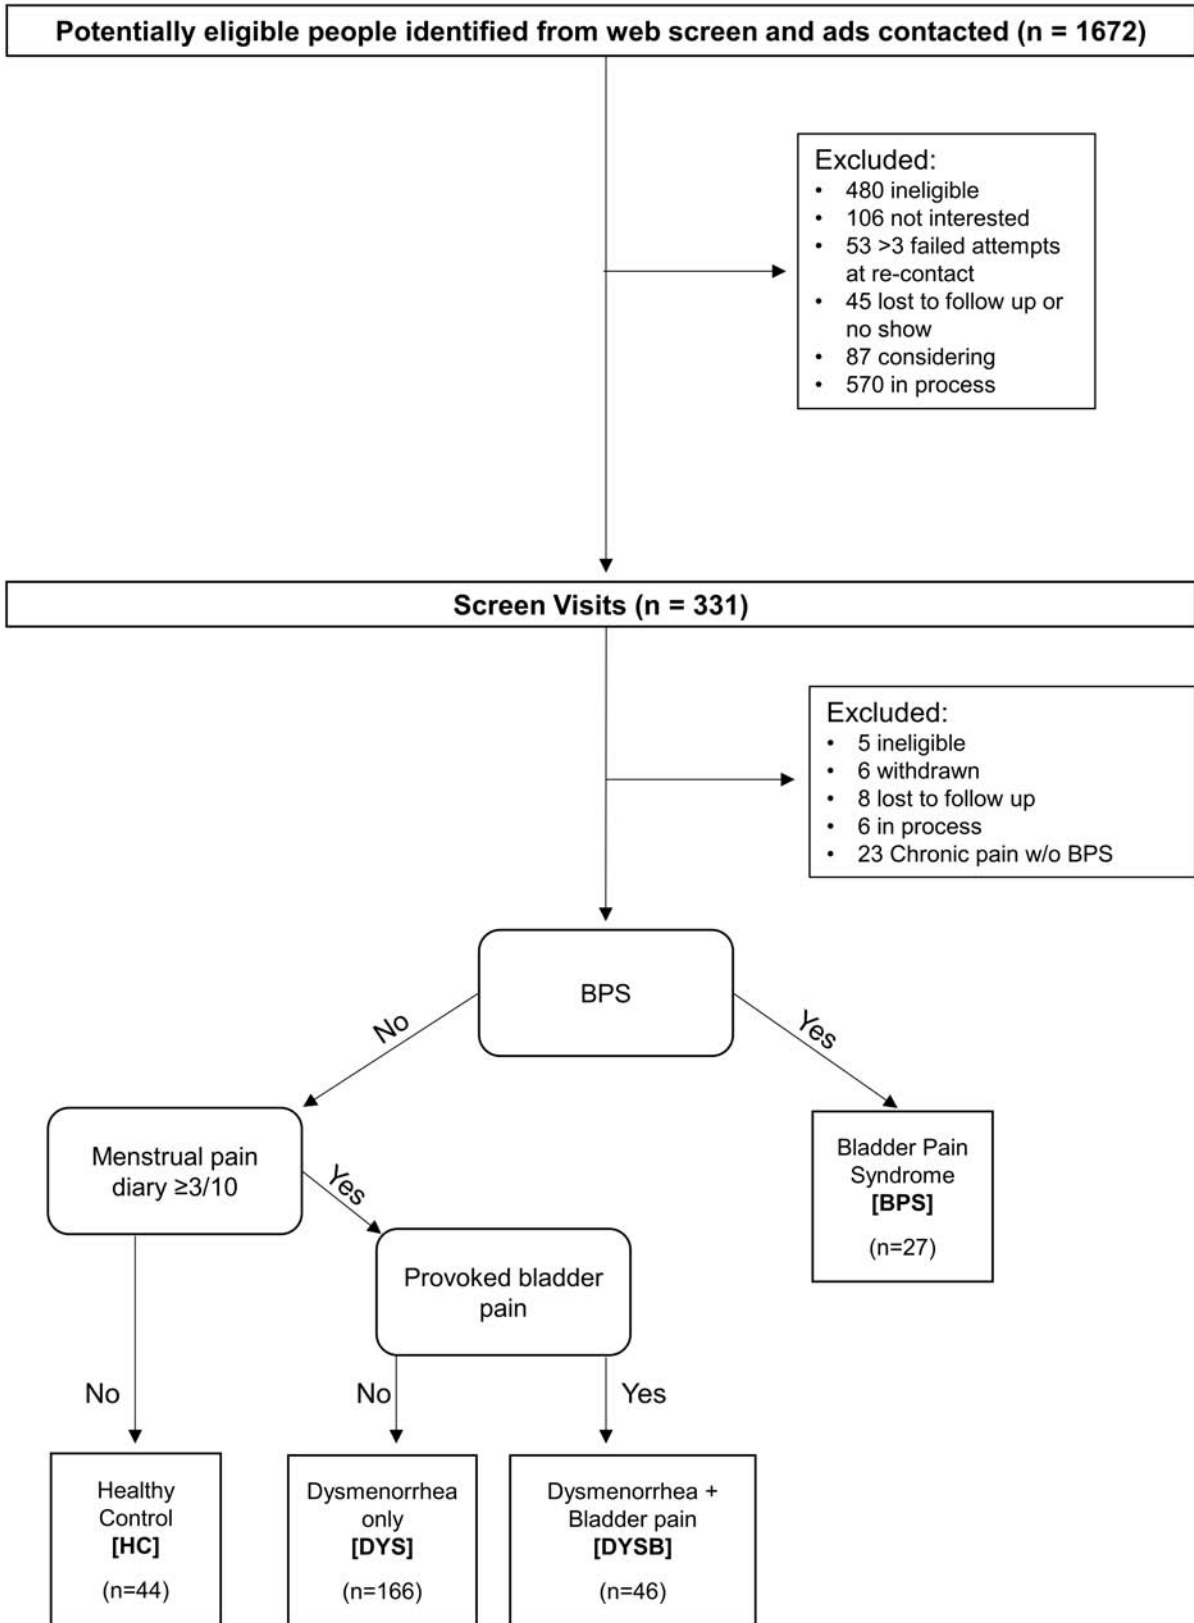

Supplement: NIHMS1547268-supplement-1.pdf [file NIHMS1547268-supplement-1.pdf]
